# Supplementary material for: Prandial Options to Advance Basal Insulin Glargine Therapy: Testing Lixisenatide Plus Basal Insulin Versus Insulin Glulisine Either as Basal-Plus or Basal-Bolus in Type 2 Diabetes: The GetGoal Duo-2 Trial
Source: Oxford University Press journal article supplement (doi:10.2337/dc16-0014), 2016-05-23
Supplement: dc160014supplementarydata.pdf [file dc160014supplementarydata.pdf]

## SUPPLEMENTARY DATA

### Supplementary Appendix

#### Supplementary Methods

##### Study Medication Administration

Following the run-in phase, patients with HbA<sub>1c</sub>  $\geq 7.0$  and  $\leq 9.0\%$  ( $\geq 53$  and  $\leq 75$  mmol/mol) at week  $-1$  with mean fasting self-monitored plasma glucose (SMPG)  $\leq 7.8$  mmol/L ( $\leq 140$  mg/dL) over the 7 days before day 1 were randomized to receive lixisenatide once daily (QD) or insulin glulisine QD or thrice daily (TID). If HbA<sub>1c</sub> was  $\geq 7.0$  and  $\leq 8.0\%$  ( $\geq 53$  and  $\leq 64$  mmol/mol) at week  $-1$ , insulin glargine dose was reduced by 20% on the day before randomization to avoid hypoglycemia when starting add-on treatment.

Patients randomized to insulin glulisine QD were administered a starting dose of 3–5 U QD titrated by the investigator to obtain a bedtime (if injected at the evening meal) or pre-lunch (if injected at breakfast) SMPG value  $>5.6$  and  $\leq 7.8$  mmol/L ( $>100$  and  $\leq 140$  mg/dL) while avoiding hypoglycemia. Injection time for lixisenatide and insulin glulisine QD was kept consistent throughout the study and was decided by the investigator based on the meal with the highest self-monitored median 2-h postprandial glucose (PPG) across three different days in the week before the week  $-1$  visit. Patients randomized to receive insulin glulisine TID were administered a starting dose of 3–5 U at each meal that was titrated by the investigator to avoid hypoglycemia and to obtain an SMPG value  $>5.6$  and  $\leq 7.8$  mmol/L ( $>100$  and  $\leq 140$  mg/dL) before the next meal (if injected at breakfast or lunch) or at bedtime (if injected before the evening meal).

##### Assays

Blood samples for analysis of HbA<sub>1c</sub> were collected at screening, at week  $-1$ , at randomization (week 0), and at weeks 12, 20, and 26; blood samples for assessment of fasting plasma glucose (FPG) were taken during run-in (weeks  $-12$ ,  $-9$ ,  $-6$ , and  $-1$ ), at randomization, and at weeks 2, 6, 8, 12, 20, and 26. Standardized liquid test meals at breakfast to assess FPG, PPG, and PPG excursions were consumed at the investigation centers on day  $-1$  (before randomization) and at week 26 by patients who had fasted overnight for at least 8 h. At the week-26 visit, lixisenatide was administered 30–60 min and insulin glulisine up to 15 min before the start of the breakfast meal test; the meal was then consumed within 15 min. Blood samples were collected immediately before administration of study medication, before the start of the meal test (0 min) and then 30, 60, and 120 min after the start of the meal.

SMPG was assessed with plasma glucose meters after training at the end of the screening phase. During seven-point SMPG measurement (on three different days in the week before the visits at weeks 0, 12, and 26), patients checked their plasma glucose with their glucose meter before and 2 h after breakfast, lunch, and the evening meal, and at bedtime. Patients used diaries to document their daily insulin doses and any missed injections. Body weight was measured at screening, during run-in (weeks  $-12$ ,  $-6$ , and  $-1$ ), at randomization, and at weeks 2, 6, 8, 12, 20, and 26.

SUPPLEMENTARY DATA

**Supplementary Figure 1.** Study design. DPP-4, dipeptidyl peptidase-4; HbA<sub>1c</sub>, glycated hemoglobin; QD, once daily; SMPG, self-monitored plasma glucose; SU, sulfonylurea; TID, thrice daily.

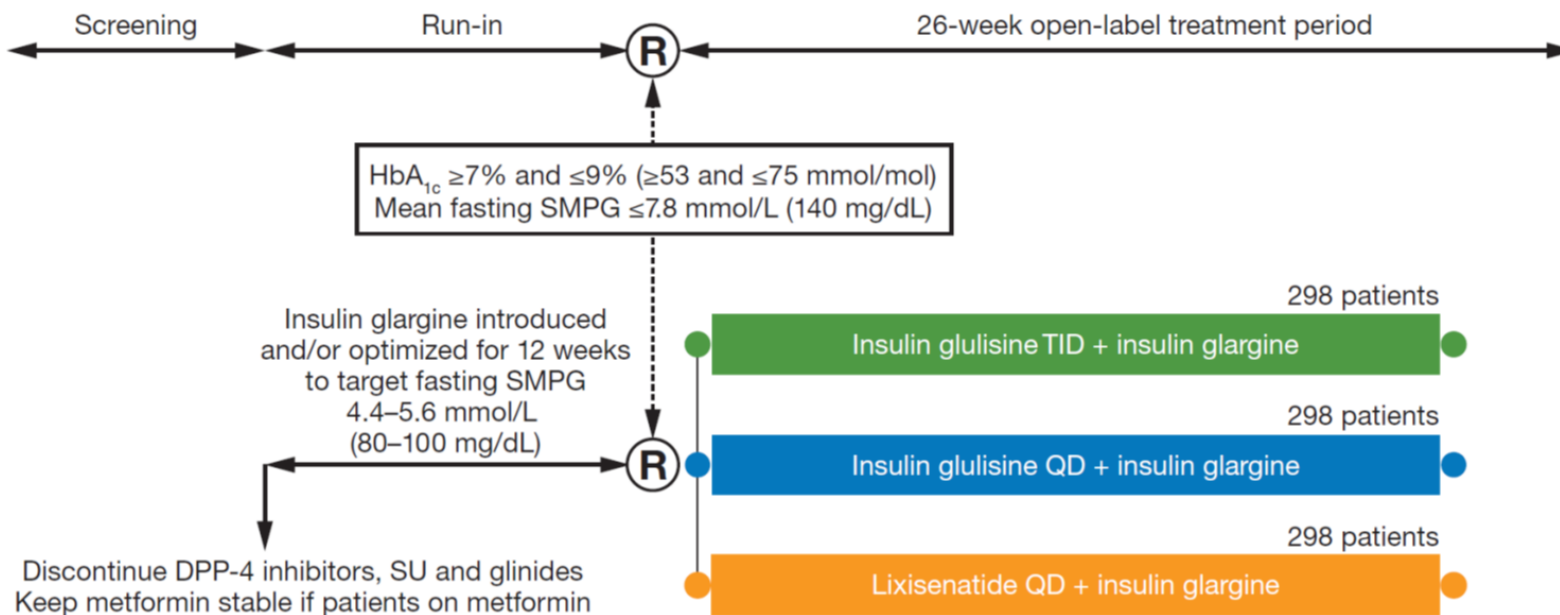

SUPPLEMENTARY DATA

**Supplementary Figure 2.** Summary of patient disposition. \*One patient did not receive study treatment in the insulin glulisine TID arm. QD, once daily; TID, thrice daily.

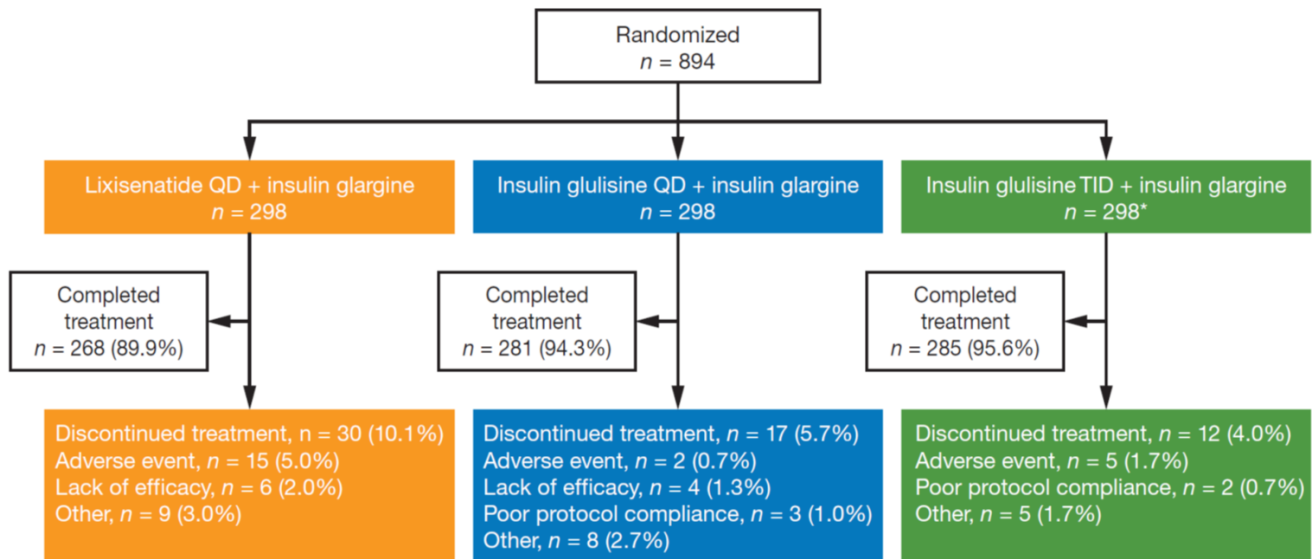

## SUPPLEMENTARY DATA

### List of Study Investigators

Canada: Ronnie Aronson, Gordon Bailey, Harpreet Baja, Joseph Berlingieri, Francois Blouin, Thomas Elliott, Andre Frechette, Pavel Hamet, Sam Henein, Michael Jones, Hasnain Khandwala, Lawrence Leiter, Patrice Perron, Daniel Shu, Linda Sinnaeve, Sean Wharton, Vincent Woo, Jean-Francois Yale; Chile: Loreto Aguirre, Gonzalo Godoy, Rodolfo Lahsen, Claudia Olivares, Juan Carlos Palma, Eliana Reyes, Carmen Lia Solis, Leonardo Soto; Czech Republic: Lenka Dzmurova, Katerina Hejnicová, Sabina Palova, Michala Pelikanova, Terezie Pelikanova, Lea Raclavska, Basil Richter, Jan Vrkoc; Estonia: Anu Ambos, Kaja Märtsin, Hella Vides, Liina Viitas; France: Guillaume Charpentier, Brigitte Delemer, Roxane Ducloux, Didier Gouet, Bruno Guerci, Martine Laville, Ignacio Lopez, Pascal Monguillon, Gaetan Prevost, Pierre Serusclat, Anne Wojtusciszyna; Germany: Klaus Busch, Uwe Böckmann, Christel Contzen, Elizaveta Degtyareva, Eva Haak, Markolf Hanefeld, Christoph Hasslacher, Agnes Himpel-Bönninghoff, Mariola Lappo, Heidrun Mehling, Richard Piechatzek, Thomas Segiett, Alexander Segner; Hungary: Nora Harcsa, Piroska Kis-Gombos, Julianna Kiss, Csaba Lengyel, Tamas Oroszlant, Zsolt Plész, Ildikó Sasvári, Albert Szcsa; Italy: Fabio Broglio, Luca Frittitta, Sandro Gentile, Piermarco Piatti, Giulio Marchesini Reggiani; Latvia: Renate Helda, Sigita Pastares, Valdis Pirags, Inguta Stura, Dace Teterovska; Lithuania: Kristina Baltramonaitiene, Natalija Denisova, Elrina Purtokaite Labutinien, Lina Radzeviciene, Gediminas Urbonas; Mexico: Rosario Arechavaleta Granell, Raul Aguilar-Orozco, Cesar Calvo Vargas, Eduardo Elizondo, Guillermo Gonzalez Galvez, Guillermo Fanghanel, Arturo Gaspar Lopez, Jesus Lujan, Leobardo Sauque-Reyna, Maricela Vidrio, Rolando Zamarripa-Escobedo; Poland: Malgorzata Arciszewska, Tomasz Biniszkiwicz, Grazyna Cieslik, Edward Franek, Marek Konieczny, Jerzy Kuleta, Mirosława Polaszewska-Muszynska; Romania: Rodica Ioana Avram, Mihaela Magdelana Busegeanu, Anca Cerghizana, Adriana Cif, Carmen Crisan, Alina Claudia Mot, Cristina-Victoria Mistodie, Mircea Munteanu, Mihaela Diana Musat, Gabriela Negrisanu, Adriana Onaca, Mioara Floricica Pavel, Ella Pintilei, Noemi Plete, Amarin Popa, Romulus Timar, Adriana Tutescu; Russian Federation: Diana Alpenidze, Alexander Dreva, Irina Karpova, Olga Lantseva, Nina Petunina, Tatiana Rodionova, Marina Sergeeva-Kondrachenko, Marina Shestakova, Sergey Shustov, Natalia Vorokhobina, Alsu Zalevskaya; Spain: Diego Bellido Guerrero, Margarita Rivas, Alfonso Soto, Francisco J. Tinahones; Ukraine: Vadym Berenfus, Victoria Chernikova, Mariya Grachova, Svitlana Kovalenko, Yuriy Mikhailovych Mostovoy, Tetyana Mykhailychenko, Natalia Pashkovska, Marina Vlasenko; United Kingdom: Kamal Abouglila, Srikanth Bellary, Melanie Davies, Niall Furlong, Simon Heller, Diana Holton, Franklin Joseph, Edward Jude, Atir Khana, Sudhesh Kumar, Rory McCrimmon, Beverley Millward; United States: Opada Alzohaili, Corey Anderson, Vanita Aroda, Masoud Azizad, Timothy Bailey, Thomas Berenguer, Anuj Bhargava, Osvaldo Brusco, Dennis Buth, Leonard Chuck, Raymond De La Rosa, Donald Eagerton, Neil Farris, Raymond Fink, Jeffrey Geohas, Murray Gordon, Craig Greenberg, Kenneth Hershon, Mitzie Hewitt, Giovanni Infusino, Ali Iranmanesh, Rajeev Jain, Flory Kreutter, James Lane, Michael Lillestol, Barry Lubin, Tilak Mallik, Michael May, Robert McNeill, Luigi Meneghini, Vicki Miller, Thomas Moretto, Samer Nakhle, Adeniyi Odugbesan, Michael Reeves, Helena Rodbard, Julio Rosenstock, Jeffrey Rothman, Alan Schwartz, Gerald Shockey, Ronald Stegemoller, Dan Streja, Alan Stringam, Sherry Sussman, James Thrasher, Neil Tran.
